# Supplementary material for: Impact of Body Composition Status on 90-Day Mortality in Cancer Patients with Septic Shock: Sex Differences in the Skeletal Muscle Index
Source: MDPI journal article supplement (doi:10.3390/jcm8101583), 2019-10-02
Supplement: s1 [file s1]

**Table S1.** Demographic and clinical characteristics of study patients with and without muscle depletion.

| Characteristics                      | Overall patients (n = 478) | Muscle depletion (n = 419) | No muscle depletion (n = 59) | P-value |
|--------------------------------------|----------------------------|----------------------------|------------------------------|---------|
| Age, years                           | 65.0 (58.0–72.0)           | 66.0 (58.0–73.0)           | 62.0 (56.0–67.0)             | 0.003   |
| Male                                 | 297 (62.1%)                | 247 (58.9%)                | 50 (84.7%)                   | < 0.001 |
| Comorbidities                        |                            |                            |                              |         |
| Hypertension                         | 169 (35.4%)                | 147 (35.1%)                | 22 (37.3%)                   | 0.740   |
| Diabetes mellitus                    | 124 (25.9%)                | 109 (26.0%)                | 15 (25.4%)                   | 0.923   |
| Type of solid cancer                 |                            |                            |                              | 0.401   |
| Hepatobiliary                        | 247 (51.7%)                | 212 (50.6%)                | 35 (59.3%)                   |         |
| Gastrointestinal                     | 91 (19.0%)                 | 79 (18.9%)                 | 12 (20.3%)                   |         |
| Gynecologic                          | 48 (10.0%)                 | 46 (11.0%)                 | 2 (3.4%)                     |         |
| Lung                                 | 31 (6.5%)                  | 28 (6.7%)                  | 3 (5.1%)                     |         |
| Others                               | 61 (12.8%)                 | 54 (12.9%)                 | 7 (11.9%)                    |         |
| Focus of infection                   |                            |                            |                              | 0.280   |
| Hepatobiliary                        | 243 (50.8%)                | 212 (50.6%)                | 31 (52.5%)                   |         |
| Respiratory                          | 63 (13.2%)                 | 59 (14.1%)                 | 4 (6.8%)                     |         |
| Others                               | 172 (36.0%)                | 148 (35.3%)                | 24 (40.7%)                   |         |
| SOFA score                           | 7.0 (5.0–10.0)             | 7.0 (5.0–10.0)             | 7.0 (5.0–9.0)                | 0.836   |
| 90-day mortality                     | 208 (43.5%)                | 188 (44.9%)                | 20 (33.9%)                   | 0.112   |
| Body composition                     |                            |                            |                              |         |
| BMI, kg/m <sup>2</sup>               | 22.0 (19.6–24.3)           | 21.8 (19.4–24.4)           | 22.8 (21.0–24.2)             | 0.029   |
| SFA, cm <sup>2</sup>                 | 89.40 (53.71–144.18)       | 92.64 (53.11–144.48)       | 87.40 (56.32–139.74)         | 0.820   |
| VFA, cm <sup>2</sup>                 | 95.29 (56.96–134.44)       | 94.69 (57.61–138.64)       | 97.81 (50.97–124.92)         | 0.424   |
| SMA, cm <sup>2</sup>                 | 89.64 (73.46–107.68)       | 84.84 (71.84–98.64)        | 125.75 (116.80–134.23)       | < 0.001 |
| SMI, cm <sup>2</sup> /m <sup>2</sup> | 34.54 (7.58)               | 32.84 (6.36)               | 46.61 (3.44)                 | < 0.001 |
| Skeletal muscle attenuation, HU      | 34.51 (6.94)               | 33.80 (6.80)               | 39.54 (5.71)                 | < 0.001 |
| VFA/SFA ratio                        | 1.07 (0.72–1.67)           | 1.07 (0.72–1.68)           | 1.02 (0.70–1.60)             | 0.483   |
| Obesity                              | 90 (18.8%)                 | 81 (19.3%)                 | 9 (15.3%)                    | 0.453   |
| Low skeletal muscle attenuation      | 202 (42.3%)                | 197 (47.0%)                | 5 (8.5%)                     | < 0.001 |

Data are presented as the mean (standard deviation), median (interquartile range), and number (percentage).

Abbreviations: BMI, body mass index; HU, Hounsfield units; SFA, subcutaneous fat area; SMA, skeletal muscle area; SMI, skeletal muscle area index; VFA, visceral fat area.

**Table S2.** Odds ratios for muscle depletion by logistic regression analysis in patients with cancer who developed septic shock.

|                                 | Univariable analysis |         | Multivariable analysis |         |
|---------------------------------|----------------------|---------|------------------------|---------|
|                                 | OR (95% CI)          | P-value | OR (95% CI)            | P-value |
| Age, years                      | 1.039 (1.013–1.065)  | 0.003   | 1.041 (1.012–1.070)    | 0.006   |
| Male                            | 0.258 (0.124–0.540)  | < 0.001 | 0.277 (0.128–0.600)    | 0.001   |
| Comorbidities                   |                      |         |                        |         |
| Hypertension                    | 0.909 (0.517–1.598)  | 0.740   |                        |         |
| Diabetes mellitus               | 1.031 (0.552–1.928)  | 0.923   |                        |         |
| Type of solid cancer            |                      |         |                        |         |
| Hepatobiliary                   | Reference            |         |                        |         |
| Gastrointestinal                | 1.087 (0.537–2.199)  | 0.817   |                        |         |
| Gynecologic                     | 3.797 (0.882–16.353) | 0.073   |                        |         |
| Lung                            | 1.541 (0.434–5.342)  | 0.495   |                        |         |
| Others                          | 1.274 (0.536–3.024)  | 0.584   |                        |         |
| Focus of infection              |                      |         |                        |         |
| Hepatobiliary                   | Reference            |         |                        |         |
| Respiratory                     | 2.157 (0.732–6.354)  | 0.163   |                        |         |
| Others                          | 0.902 (0.509–1.599)  | 0.723   |                        |         |
| SOFA score                      | 1.017 (0.933–1.109)  | 0.706   |                        |         |
| Low skeletal muscle attenuation | 9.584 (3.758–24.438) | < 0.001 | 7.454 (2.891–19.219)   | < 0.001 |

Abbreviations: CI, confidence interval; OR, odds ratio; SMI, skeletal muscle area index; SOFA, Sequential Organ Failure Assessment.

**Table S3.** Hazard ratios for 90-day mortality by Cox proportional hazards analysis in patients with cancer who developed septic shock.

|                                      | Univariable analysis |         | Multivariable analysis |         |
|--------------------------------------|----------------------|---------|------------------------|---------|
|                                      | HR (95% CI)          | P-value | HR (95% CI)            | P-value |
| Age, years                           | 1.00 (0.99–1.01)     | 0.991   |                        |         |
| Male                                 | 0.91 (0.69–1.20)     | 0.506   |                        |         |
| Comorbidities                        |                      |         |                        |         |
| Hypertension                         | 1.03 (0.78–1.37)     | 0.838   |                        |         |
| Diabetes mellitus                    | 1.00 (0.73–1.36)     | 0.980   |                        |         |
| Type of solid cancer                 |                      |         |                        |         |
| Hepatobiliary                        | Reference            |         |                        |         |
| Gastrointestinal                     | 0.97 (0.67–1.39)     | 0.854   |                        |         |
| Gynecologic                          | 0.66 (0.38–1.13)     | 0.127   |                        |         |
| Lung                                 | 1.51 (0.92–2.49)     | 0.105   |                        |         |
| Others                               | 1.07 (0.70–1.63)     | 0.771   |                        |         |
| Focus of infection                   |                      |         |                        |         |
| Hepatobiliary                        | Reference            |         | Reference              |         |
| Respiratory                          | 1.54 (1.05–2.24)     | 0.026   | 1.44 (0.98–2.10)       | 0.063   |
| Others                               | 0.86 (0.63–1.17)     | 0.340   | 0.86 (0.63–1.18)       | 0.346   |
| SOFA score                           | 1.05 (1.00–1.09)     | 0.046   | 1.04 (1.00–1.09)       | 0.052   |
| SMI, cm <sup>2</sup> /m <sup>2</sup> | 0.97 (0.95–0.99)     | 0.001   | 0.97 (0.95–0.99)       | 0.001   |
| Low skeletal muscle attenuation      | 1.41 (1.08–1.86)     | 0.013   |                        |         |

Abbreviations: CI, confidence interval; HR, hazard ratio; SMI, skeletal muscle area index; SOFA, Sequential Organ Failure Assessment.
